# Supplementary material for: Selection of Beauveria bassiana (Hypocreales: Cordycipitaceae) strains to control Xyleborus affinis (Curculionidae: Scolytinae) females
Source: PeerJ. 2020 Jul 3;8:e9472. doi: 10.7717/peerj.9472 (PMC7337030; doi:10.7717/peerj.9472)
Supplement: Supplemental Information 4 [file peerj-08-9472-s004.docx]

| **Table S4.** Measured variables in the second phase of *Beauveria bassiana* selection. | | | | | |
| --- | --- | --- | --- | --- | --- |
| **Strain** | **Variablesa** | | | | |
| **Conidia bound Pr1**  **(nmoles NA mL-1**  **min-1)** | **Conidia bound NAGases**  **(nmoles NP mL-1 min-1)** | **Relative hydrophobicity**  **(%)** | | **Unipolar-germinated**  **Conidia (%)** |
| 21 | 107.89±3.16c | 9.99±0.43a | 88.17±2.4abc | 76.13±11.93abc | |
| 26 | 74.67±2.74a | 7.16±1.26a | 87.50±1.75abc | 60.13±9.82abc | |
| 37 | 81.64±2.91ab | 9.97±1.04a | 76.33±9.52bc | 56.88±10.67bc | |
| 38 | 112.64±1.11c | 11.21±2.39abc | 90.28±9.09ab | 66.63±14.27abc | |
| 44 | 107.67±6.14c | 7.71±1.84a | 96.23±4.86a | 85.50±6.59a | |
| 117 | 110.00±2.1c | 16.15±1.01c | 67.42±6.79c | 82.17±2.71c | |
| 171 | 110.89±2.92c | 6.63±1.64a | 92.25±7.75ab | 84.50±6.14ab | |
| 174 | 90.94±9.40b | 11.10±2.64ab | 86.67±0.76abc | 83.50±4.69abc | |
| 431 | 111.64±4.73c | 19.78±0.53d | 86.17±2.88abc | 65.63±6.61abc | |
| 485 | 245.25±4.79d | 17.68±2.22d | 74.42±3.41bc | 7.13±2.47d | |

aMeans ± SD within a column followed by the same upper letter were not statistically different (*p*<0.05). NA: Nitroaniline, NP: Nitrophenol
