# Supplementary material for: Selection of Beauveria bassiana (Hypocreales: Cordycipitaceae) strains to control Xyleborus affinis (Curculionidae: Scolytinae) females
Source: PeerJ. 2020 Jul 3;8:e9472. doi: 10.7717/peerj.9472 (PMC7337030; doi:10.7717/peerj.9472)
Supplement: Supplemental Information 6 — Principal components stages 1 and 2 [file peerj-08-9472-s006.xlsx]

## Sheet: Growt rate
Repetition	CHE-CNRCB 21	CHE-CNRCB 22	CHE-CNRCB 25	CHE-CNRCB 26	CHE-CNRCB 27	CHE-CNRCB 30	CHE-CNRCB 37	CHE-CNRCB 38	CHE-CNRCB 44	CHE-CNRCB 105	CHE-CNRCB 117	CHE-CNRCB 171	CHE-CNRCB 173	CHE-CNRCB 174	CHE-CNRCB 431	CHE-CNRCB 483	CHE-CNRCB 484	CHE-CNRCB 485	CHE-CNRCB 486
1	2.15	2.85	4.36	2.611	2.35	2.53	3.66	2.93	2.14	2.86	2.84	3.33	2.88	3.22	3.74	2.88	2.56	2.83	2.22
2	1.86	3.08	2.98	2.07	2.1	1.77	3.65	3.45	2.55	3.8	2.58	3.35	2.86	3.46	3.61	2.5	3.18	3.28	1.78
3	1.94	3.33	3.61	2.078	2.1	2.13	3.88	2.67	2.72	3.29	3.16	3.39	2.37	3.63	3.97	2.77	3.41	3.22	2.97

## Sheet: Conidial Production
Replication	CHE-CNRCB 21	CHE-CNRCB 22	CHE-CNRCB 25	CHE-CNRCB 26	CHE-CNRCB 27	CHE-CNRCB 30	CHE-CNRCB 37	CHE-CNRCB 38	CHE-CNRCB 44	CHE-CNRCB 105	CHE-CNRCB 117	CHE-CNRCB 171	CHE-CNRCB 173	CHE-CNRCB 174	CHE-CNRCB 431	CHE-CNRCB 483	CHE-CNRCB 484	CHE-CNRCB 485	CHE-CNRCB 486
1	1.04759e+09	4.57326e+08	3.39626e+08	7.60437e+08	3.75787e+08	2.11646e+08	8.5722e+08	6.45219e+08	2.04083e+09	1.6485e+08	1.2089e+09	1.38025e+09	2.58797e+07	1.29044e+09	4.85687e+08	2.66951e+08	1.66622e+08	1.31171e+08	2.69432e+08
2	1.29398e+09	2.21927e+08	2.28308e+08	5.84951e+08	1.51024e+08	1.34007e+08	6.7358e+08	5.21138e+08	1.72531e+09	3.61961e+08	1.03164e+09	1.77849e+09	1.76194e+07	1.14154e+09	3.26155e+08	3.27573e+08	2.10582e+08	1.54569e+08	2.72268e+08
3	1.17723e+09	3.26864e+08	2.52309e+08	7.7639e+08	3.72242e+08	1.36843e+08	6.23948e+08	5.02704e+08	9.39467e+08	2.59506e+08	8.72109e+08	1.90848e+09	1.76194e+07	1.4677e+09	3.00334e+08	1.79385e+08	6.38129e+08	1.40388e+08	2.68723e+08

## Sheet: Conidial germination
Replication	CHE-CNRCB 21	CHE-CNRCB 22	CHE-CNRCB 25	CHE-CNRCB 26	CHE-CNRCB 27	CHE-CNRCB 30	CHE-CNRCB 37	CHE-CNRCB 38	CHE-CNRCB 44	CHE-CNRCB 105	CHE-CNRCB 117	CHE-CNRCB 171	CHE-CNRCB 173	CHE-CNRCB 174	CHE-CNRCB 431	CHE-CNRCB 483	CHE-CNRCB 484	CHE-CNRCB 485	CHE-CNRCB 486
1	98	87	98	98	98	82	97	96	88	94	93.5	93	95	97	77	98	94	95	98
2	96	91	86	98	98	85	98	94	94	90		94	94	96	79	98	93	98	96
3	98	98	96	96	94	91	98	92	89	95		97	99	94	98	97	95	97	98
4	99	98	92	98	97	93	98	96	91	93	88.6667	75	97	81	98	95	98	98	97
5	96	98	98	97	77	85	95	98	90	96		94	97	97	98	98	96	97	98
6	97	98	99	98	90	97	99	98	96	88		98	98	95	99	95	96	96	98
7	98	99	90	98	98	90	98	98	85	98	96.6667	94	88	97	84	93	90	92	97
8	99	98	98	98	84	92	98	81	96	98		98	98	98	91	93	98	98	98
9	98	98	94	98	98	98	98	93	92	98		95	93	86	98	98	98	98	98

## Sheet: Germ tube legth
Replication	CHE-CNRCB 21	CHE-CNRCB 22	CHE-CNRCB 25	CHE-CNRCB 26	CHE-CNRCB 27	CHE-CNRCB 30	CHE-CNRCB 37	CHE-CNRCB 38	CHE-CNRCB 44	CHE-CNRCB 105	CHE-CNRCB 117	CHE-CNRCB 171	CHE-CNRCB 173	CHE-CNRCB 174	CHE-CNRCB 431	CHE-CNRCB 483	CHE-CNRCB 484	CHE-CNRCB 485	CHE-CNRCB 486
1	53	75.6145	46.88	60.21	55.74	22.46	80.15	41.28	17.07	97.34	22.61	24.14	24.13	40.42	32.1	27.48	32.98	86.08	63.79
2	48.7749	71.5807	40.407	42.95	56.11	26.29	77.06	67.46	27.7	72.44	24.89	18.77	25.42	31.27	24.86	36.74	49.48	102.72	58.57
3	42.3717	45.497	40.81	85.81	38.5	24.28	53.17	69.43	34.88	106.23	31.15	27.81	24.4	44.76	45.1	45.63	27.83	86.53	85.13
4	53.4501	99.311	21.12	67.43	51.9	22.81	63.3	41.41	23.99	54.71	30.61	30.15	34.05	42.11	35.53	50.58	58.28	64.32	42.07
5	73.8177	88.8536	35.99	64.28	69.94	29.19	66.54	70.36	22.44	45.1	33.82	23.52	32.45	22.99	35.29	49.24	63.59	81.9	86.58
6	50.475	77.4214	27.15	65.72	54.85	32.67	61.04	40.76	21.96	65.04	37.47	22.2	38.16	23.29	31.46	52.61	32.72	106.24	70.56
7	49.1974	106.434	37.9103	77.21	48.55	38.25	77.14	47.7	14.89	53.38	26.08	29.66	30.99	23.43	26.95	57.16	46.93	122.51	51.47
8	67.6614	59.8788	42.5702	93.21	83.07	18.33	65.4	31.89	24.49	65.22	44.98	23.07	27.31	32.17	34.36	51.36	49.01	90.45	60.85
9	36.0881	49.1363	38.4702	86.29	71.86	31.9	58.49	37.68	18.74	58.43	31.97	28.19	22.77	28.63	43.35	49.25	31.89	64.32	42.26
10	54.6768	49.5537	41.2468	72.96	84.6	24.21	82.76	48.28	23.18	86.63	31.63	28.02	26.08	26.67	37.43	31.62	31.14	70.23	78.33
11	48.3397	65.8773	28.0205	48.28	52.89	38.65	65.62	77.89	20.45	103.32	20.35	23.47	23.16	27.02	64.04	40.08	31.68	92.78	78.37
12	55.4912	56.8248	57.4152	47.84	37.97	49.16	65.88	38.6	30.2	70.88	24.64	35.42	25.46	39.19	41.48	35.78	47.68	71.73	66.4
13	53.7733	41.8449	32.4717	64.51	55.26	24.09	47.93	46.33	18.92	82.16	37.64	27.58	19.34	29.59	64.51	39.62	33.35	61.14	58.31
14	67.7988	42.9545	34.4517	39.45	72.38	38.07	79.81	53.97	13.78	63.03	46.24	24.03	36.92	25.65	67.73	38.35	31.84	59.4	60.13
15	37.5031	50.5717	32.632	59.01	110.28	16.63	86.57	72.29	10.57	39.38	37.2	30.18	20.13	42.62	49.99	32.15	25.3	53.95	71.09
16	63.2662	35.9812	24.2869	50.1	38.84	24.55	93.54	62.66	14.72	78.41	27.09	24.49	25.8	26.94	37.97	49.96	37.1	88.71	74.96
17	53.6715	46.6778	38.5109	53.64	29.8	24.29	105.77	81.26	29.69	50.51	37.46	24.81	20.48	23.91	42.8	40.07	51.35	84.88	73.84
18	67.4705	37.7398	44.4968	46.9	33.76	25.38	124.54	93.67	29.57	93.67	30.01	25.81	24.32	13.61	36.84	42.06	63.26	71.12	64.61
19	52.2209	46.4361	39.4704	55.57	51.14	21.51	92.57	95.54	15.66	38.01	25.98	21.88	15.89	21.61	54.77	24.71	29.92	64.7	70.18
20	52.2209	81.3102	32.3011	59.65	34.2	40.44	53.26	82.73	34.23	68.32	23.18	28.15	37.13	18.61	50.69	31.23	42.6	75.53	54.72
21	49.1618	101.344	40.1372	62.8	91.42	37.85	66.48	92.94	18.64	61.27	30.89	25.78	15.4	30.65	44.08	25.47	40	59.97	51.09
22	54.2619	104.437	39.2566	48.22	99.89	37.8	67.32	78.3	21.93	87.08	25.43	28.68	29.93	21.84	62.36	35.45	44.02	101.76	65.78
23	84.3158	82.486	37.9358	72.65	78.64	26.33	66.94	50.46	27.11	52.15	52.49	19.1	23.52	18.85	53.92	32.23	40.8	70.03	82.6
24	40.5978	112.626	37.3199	58.05	88.62	35.5	127.53	41.9	15.57	62.87	34.09	36.45	32.07	43.69	37.33	28.58	28.86	93.36	66.95
25	67.0811	65.5846	27.1399	96.91	119.56	41.01	94	45.42	17.76	101.19	25.75	19.76	25.79	24.09	41.58	40.47	58.85	75.33	60.54
26	62.0725	99.7716	32.0339	53.78	85.74	36.39	92.28	51.02	20.33	85.78	51.66	21.21	31.36	32.3	23.25	36.84	33.1	69.69	77.63
27	49.4163	60.1842	21.7216	91.86	61.9	33.15	65.17	39.65	11.21	70.08	37.43	20.53	28.57	24.85	43.53	42.42	37.25	87.67	48.11
28	63.116	92.1697	18.2629	93.92	60.85	26.33	70.73	39.86	15.83	56.31	24.68	30.06	34.75	25.69	48.51	41.85	43.95	89.02	52.64
29	39.6231	78.5082	19.4794	102.95	87.06	46.96	95.12	52.31	12.97	52.98	57.24	16.98	26.85	22.34	30.43	42.78	41.77	64.21	43.54
30	67.3458	110.089	24.84	96.19	94.03	26.89	62.81	41.44	9.76	60.87	27.74	19.97	29.67	21.85	22.01	38.65	39.64	58.51	78.02

## Sheet: Pr1 Protease Activity
Replication	CHE-CNRCB 21	CHE-CNRCB 26	CHE-CNRCB 27	CHE-CNRCB 30	CHE-CNRCB 37	CHE-CNRCB 38	CHE-CNRCB 44	CHE-CNRCB 117	CHE-CNRCB 171	CHE-CNRCB 174	CHE-CNRCB 431	CHE-CNRCB 485
1	110.583	73.1667	110	112.25	80	112.917	110.917	111.917	111	80.3333	113.167	239.75
2	108.667	73	115.333	112.083	79.9167	113.583	111.5	107.75	113.75	94.25	115.417	248.5
3	104.417	77.8333	111.917	114.167	85	111.417	100.583	110.333	107.917	98.25	106.333	247.5

## Sheet: Chitinase Activity
Replication	CHE-CNRCB 21	CHE-CNRCB 26	CHE-CNRCB 27	CHE-CNRCB 30	CHE-CNRCB 37	CHE-CNRCB 38	CHE-CNRCB 44	CHE-CNRCB 117	CHE-CNRCB 171	CHE-CNRCB 174	CHE-CNRCB 431	CHE-CNRCB 485
1	10.4938	7.18519	17.2099	24.7407	8.76543	12.8889	5.95062	15.9753	7.50617	14.1481	20.2469	17.6296
2	9.75309	8.39506	15.284	22.321	10.6173	8.46914	9.62963	17.2346	7.65432	9.55556	19.8765	15.4815
3	9.7284	5.87654	13.4074	23.8519	10.5185	12.2716	7.55556	15.2346	4.74074	9.58025	19.2099	19.9259

## Sheet: Hidrophobicity 
Replication	CHE-CNRCB 21	CHE-CNRCB 26	CHE-CNRCB 27	CHE-CNRCB 30	CHE-CNRCB 37	CHE-CNRCB 38	CHE-CNRCB 44	CHE-CNRCB 117	CHE-CNRCB 171	CHE-CNRCB 174	CHE-CNRCB 431	CHE-CNRCB 485
1	90.75	87.5	66.5	79.25	72	99.85	97.95	73.75	92.25	87.5	86.25	70.5
2	87.75	89.25	81.75	78.5	69.75	81.75	100	60.25	100	86	89	76
3	86	85.75	77.25	85.5	87.25	89.25	90.75	68.25	84.5	86.5	83.25	76.75

## Sheet: Monopolar conidial germination 
Replication	CHE-CNRCB 21	CHE-CNRCB 26	CHE-CNRCB 27	CHE-CNRCB 30	CHE-CNRCB 37	CHE-CNRCB 38	CHE-CNRCB 44	CHE-CNRCB 117	CHE-CNRCB 171	CHE-CNRCB 174	CHE-CNRCB 431	CHE-CNRCB 485
1	64	64	61	63	61	80	98	82	83	81	67	9
2	50	51	70	80	36	84	82	85	70	90	61	23.8
3	77	68	50	71	87	61	97	78	92	78	84	49
4	93	78	38	86	62	50	91	84	95	90	38	8
5	80	80	37	65	55	54	80	84	85	69	36	3
6	73	48	46	79	56	44	87	80	84	75	29	2
7	54	61	60	71	35	53	93		88	81	59	8
8	53	43	71	44	63	53	95		72	81	65	37
9	53	65	74	53	65	67	83		66	88	76	9
10	39	54		40	50	73	75		82	89	73	10
11	66	57		58			93		90	80	67	16
12	83						60					5
13												5

## Sheet: Mortality 
Strain	Experiment	Replication	Observed Mortality (OM)	Mortality	Average Mortality	SD Mortality
44	1	1	20	45	40	13.2288
		2	70
	2	1	70	45
		2	20
	3	1	30	35
		2	40
	4	1	30	20
		2	10
	5	1	30	55
		2	80
171	1	1	60	50	48	9.08295
		2	40
	2	1	40	35
		2	30
	3	1	30	45
		2	60
	4	1	40	60
		2	80
	5	1	50	50
		2	50
431	1	1	30	45	48	9.74679
		2	60
	2	1	40	35
		2	30
	3	1	50	60
		2	70
	4	1	50	55
		2	60
	5	1	30	45
		2	60
485	6	1	70	65	58.75	13.7689
		2	60
	7	1	50	50
		2	50
	8	1	70	75
		2	80
	9	1	50	45
		2	40
	10	1		#DIV/0!
		2
